# Supplementary material
Source: Research Square preprint supplement (doi:10.21203/rs.3.rs-9714769/v1)
Supplement: Supplementary file 1 [file 5e3e17dbec77ca47a5ea6d39.docx]

Journal name:*Mycopathologia*

Synergistic Effects of Cepharanthine and Amphotericin B Against *Candida albicans* by Targeting *PMP3*-Mediated Sphingolipid Biosynthesis and Membrane Disruption

Song Wang1, Qiya Zhang1, Qinlan Li1, Guoya Wang1, Xu Tan1,2, Yan Liang1,2 and Chengguang Zhu1,2, *

1 College Of Stomatology of Guizhou Medical University, Guiyang 550004, China;

2 Department of Operative Dentistry and Endodontics, Stomatological Hospital of Guizhou Medical University, Guiyang 550004, China;

* Corresponding author.E-mail: zhuchengguang@gmc.edu.cn.

Table S1. Primers used for quantitative real-time PCR (RT-qPCR) analysis of *PMP3* and housekeeping gene in Candida albicans.

| Genes | Primer | Nucleotide sequence（5’-3’） |
| --- | --- | --- |
| *ACT1* | Forward | ACGGTGAAGAAGTTGCTGCT |
| Reverse | TGGATTGGGCTTCATCACCA |
| *CAALFM_C301910CA* | Forward | CACCAGTAGCTGTGTTTATG |
| Reverse | TGTAAGATAGCAGGGAACCA |
| *CAALFM_C102700CA* | Forward | ACGTGTTCCGATATCATTAAAA |
| Reverse | GATACCTGGAATATAACCCAAAA |
| *CAALFM_C208700CA* | Forward | GGCAGAGATGGGAGAGATGA |
| Reverse | CAGGAATAGGAGCCACAGGA |


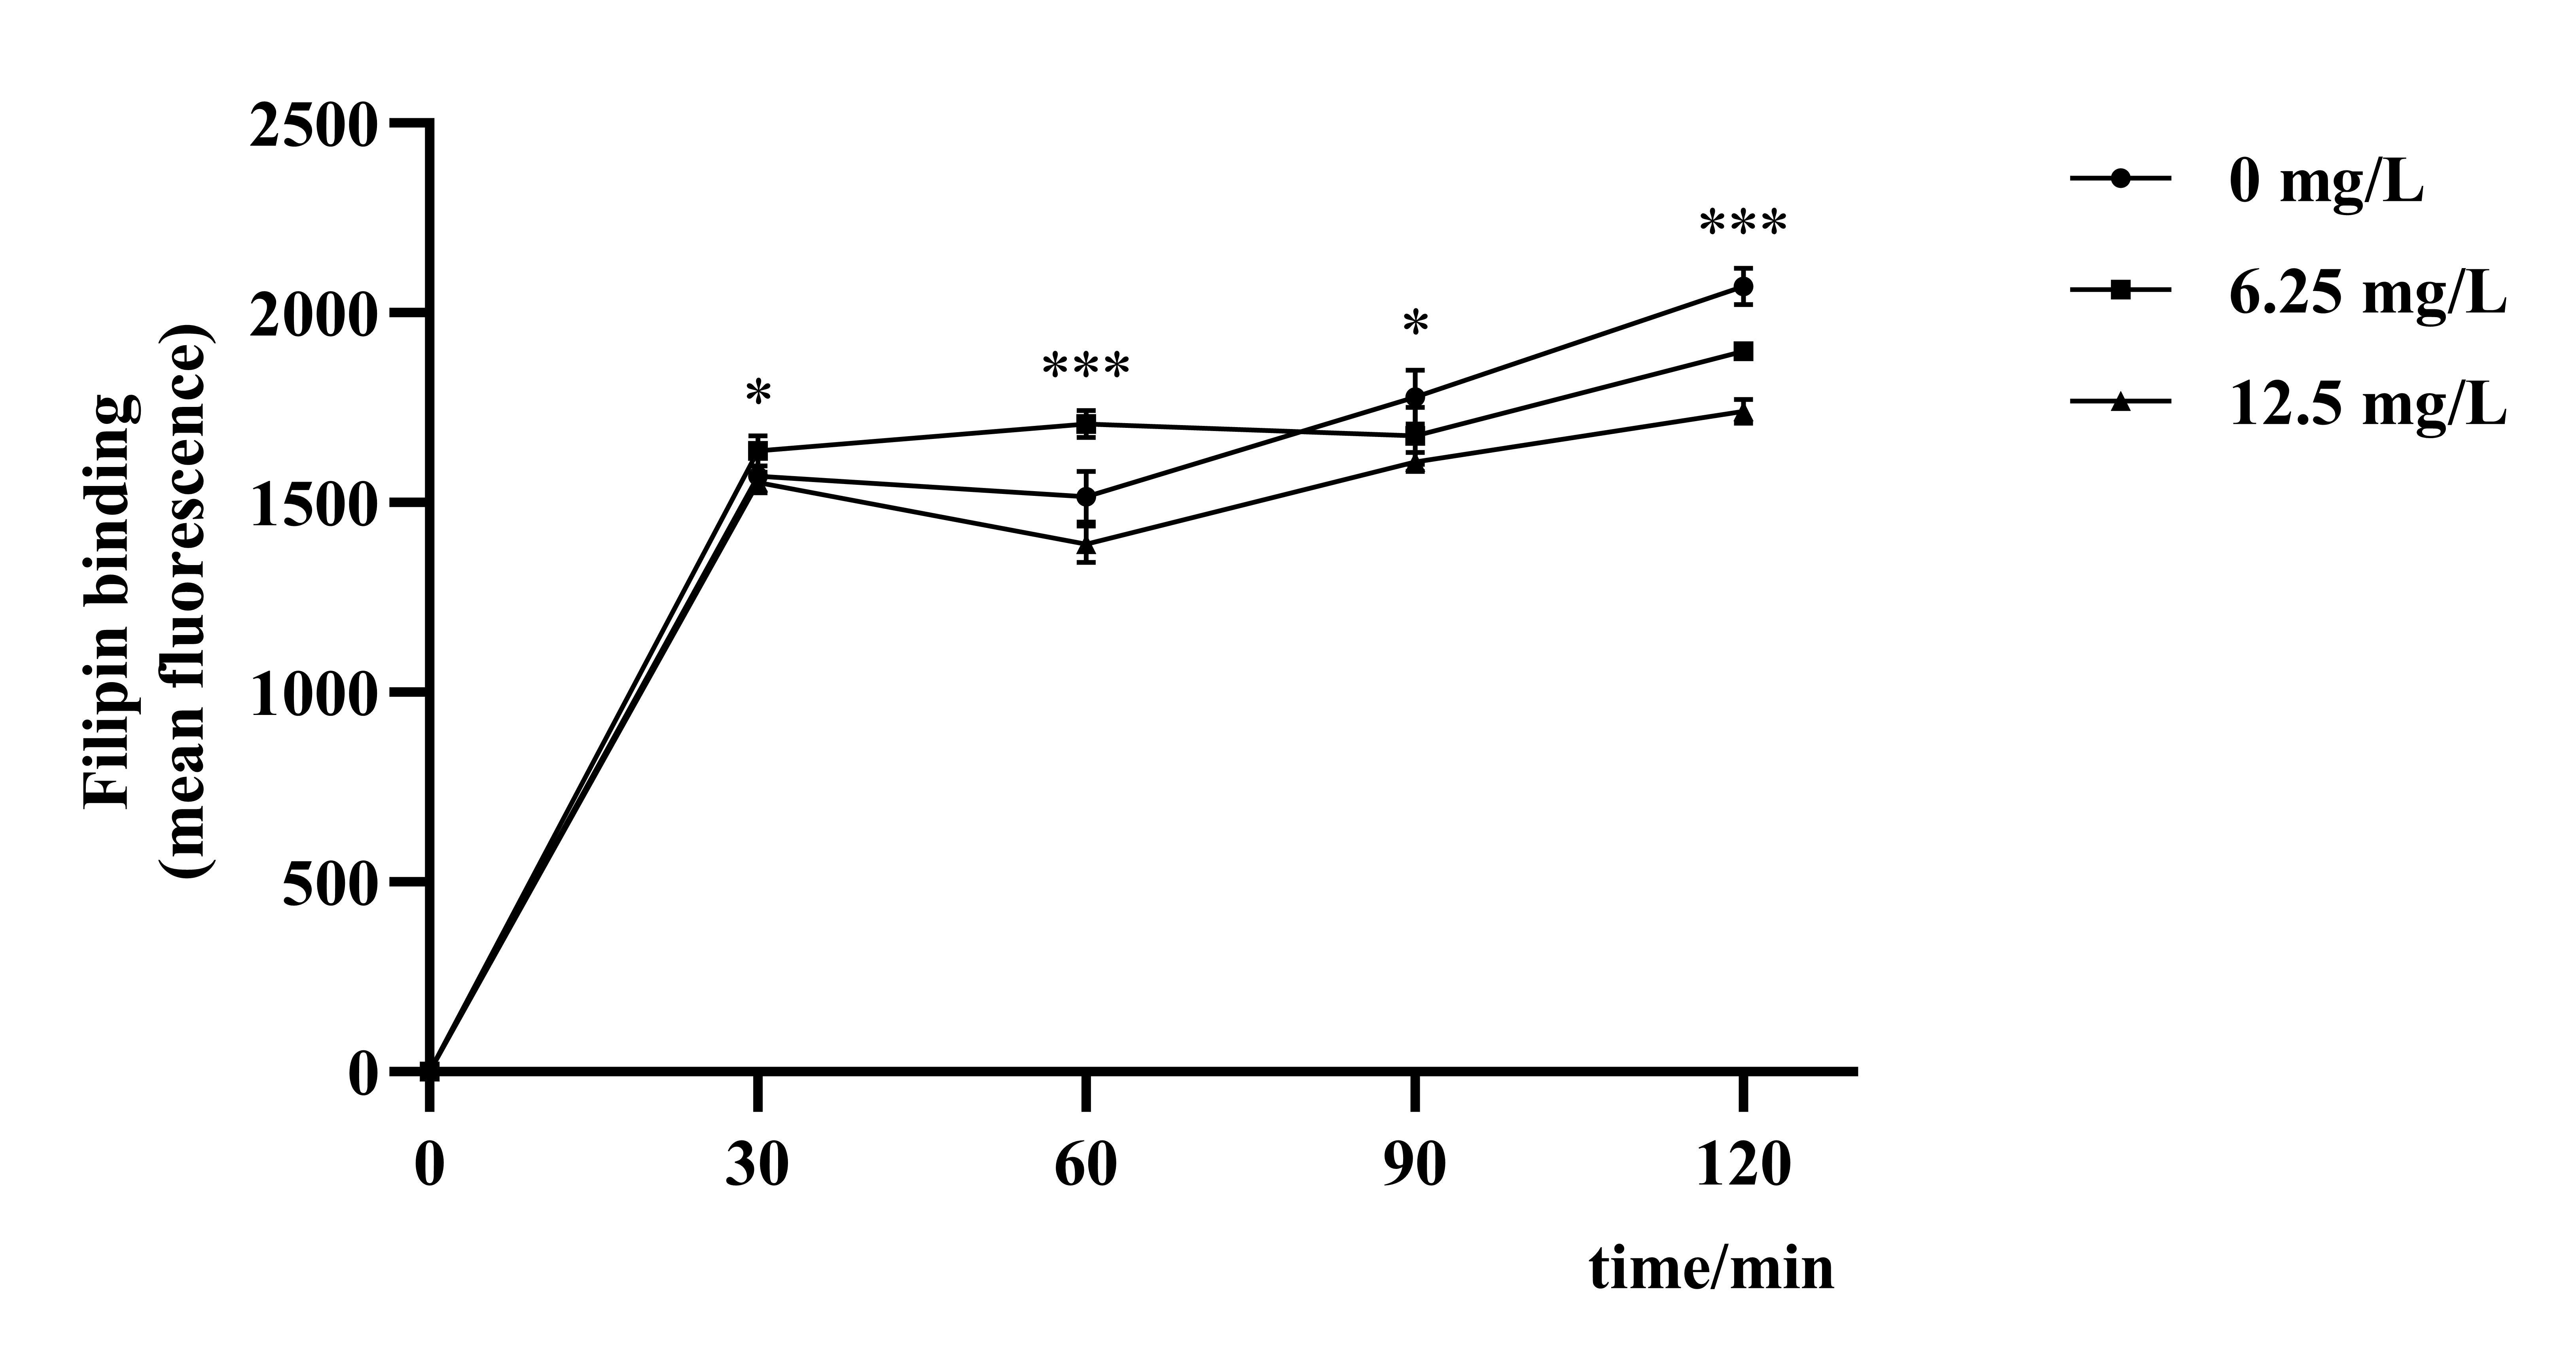


Figure S1. Filipin fluorescence intensity under different CEP concentrations.


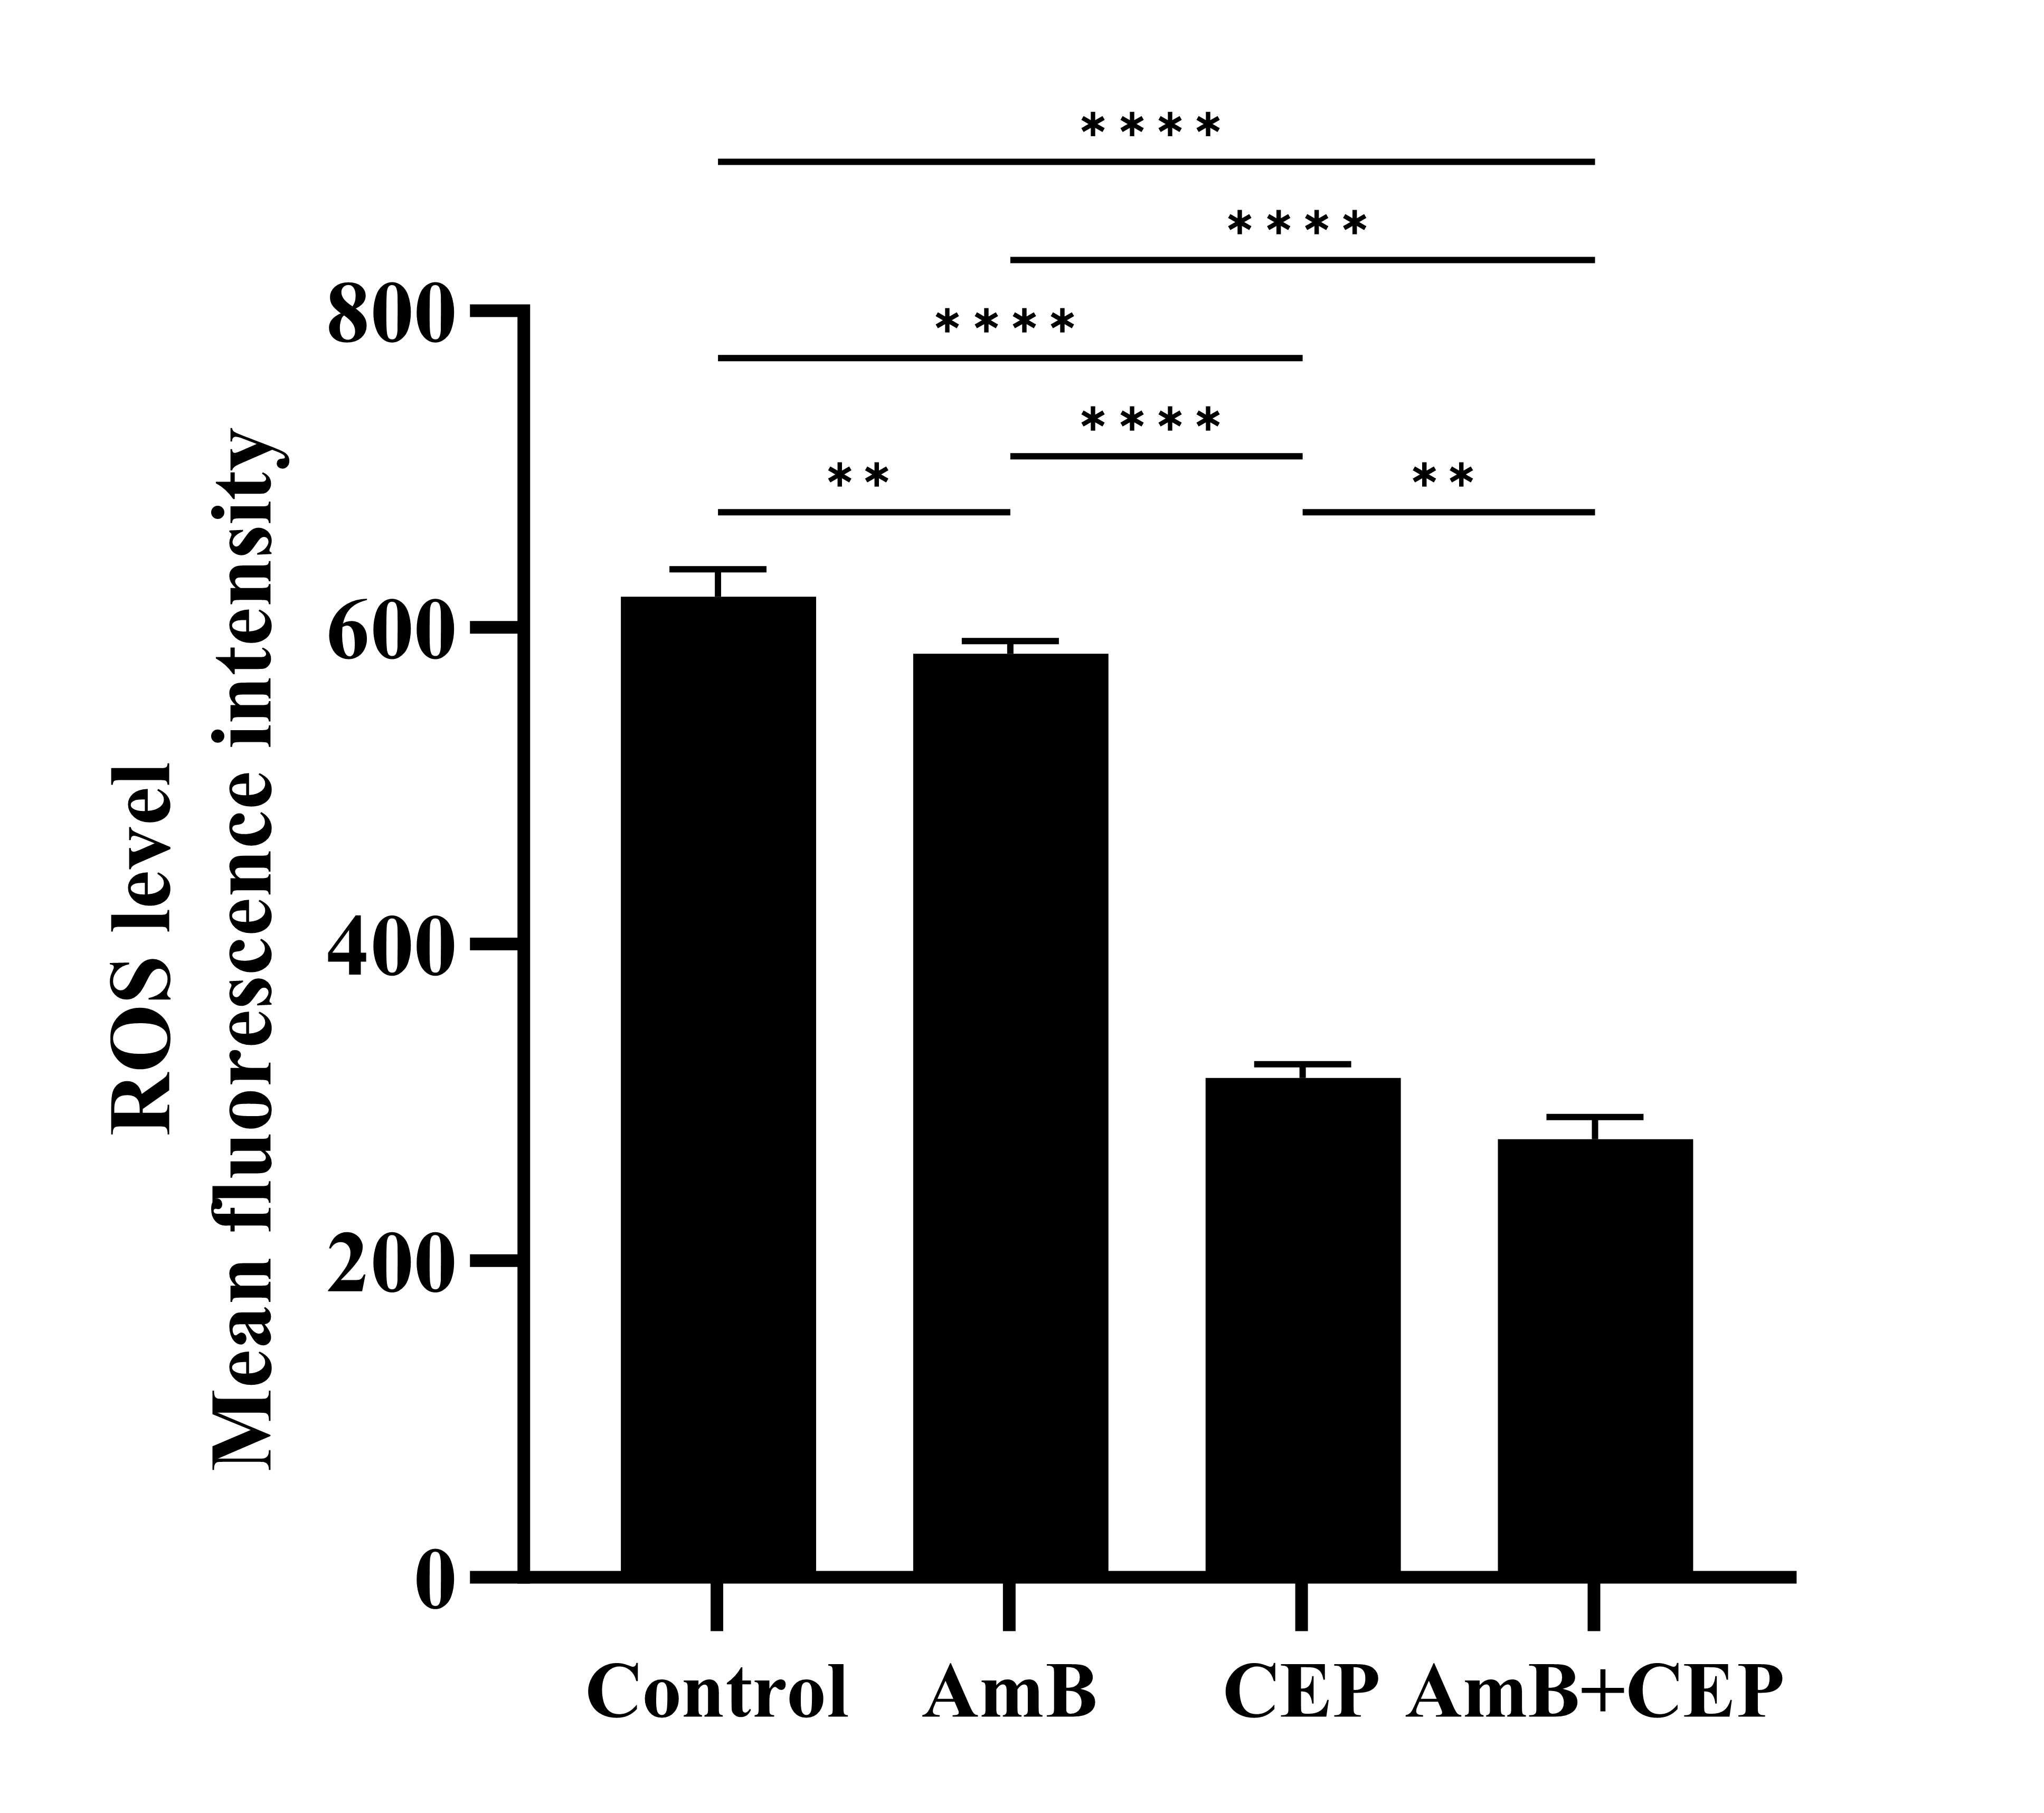


Figure S2. Effect of CEP combined with AmB on intracellular ROS levels in Candida albicans.
